# Supplementary material for: Reversal of Fragile X Phenotypes by Manipulation of AβPP/Aβ Levels in Fmr1KO Mice
Source: PLoS One. 2011 Oct 26;6(10):e26549. doi: 10.1371/journal.pone.0026549 (PMC3202540; doi:10.1371/journal.pone.0026549)
Supplement: Table S1 — Age and medications of donors. (XLS) [file pone.0026549.s003.xls]

## Sheet: Sheet1
Supplementary Table 1: Age and medications of donors.
Controls (avg age = 27 yr; SD=3.4)
Age at draw (yr)	Medications at Draw
27	none
28	none
33	none
29	none
25	none
23	none
24	none
FXS (avg age = 21.3 yr; (SD=7.4)
Age at draw (yr)	Medications at draw
32	citalopram
20	dextroamphetamine
30	none
21	sertraline
11	aripiprazole
26	none
9	topiramate, fluvoxamine, levetiracetam
25	aripiprazole
21	escitalopram
18	none
